# Supplementary material
Source: MDPI journal article supplement (https://www.mdpi.com/2673-3501/4/1/4)
Supplement: s1 [file s1]

## Supplementary Materials

### Wild-Type and SOD1-G93A SH-SY5Y under Oxidative Stress: EVs Characterization and Topographical Distribution of Budding Vesicles

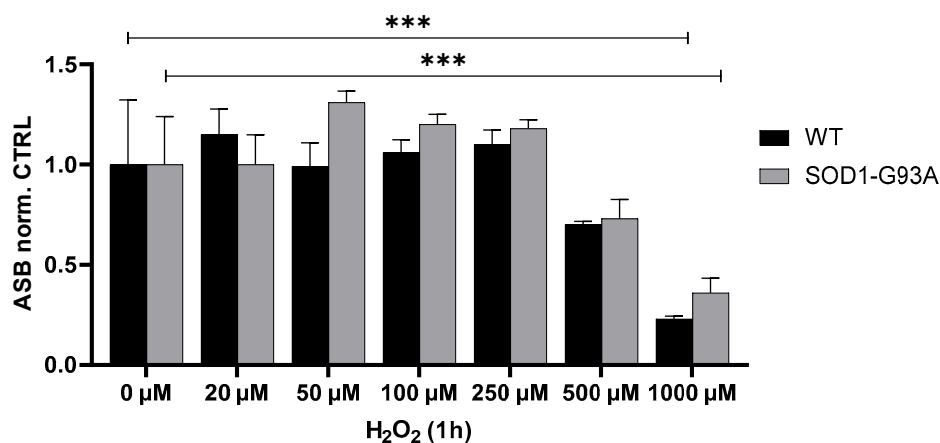

**Figure S1.** MTT assay performed on WT and SOD1-G93A SH-SY5Y treated with H<sub>2</sub>O<sub>2</sub> for 1 hour with the following concentrations: 0 (control), 20, 50, 100, 250, 500 and 1000 μM to measure cell viability after treatment. Data are expressed as mean ± SD; statistical analysis was carried out using two-way ANOVA with Sidak's multiple comparison test (n = 3). \*\*\* p < 0.001, when compared with the control group.
